# Supplementary material for: MoSET1 (Histone H3K4 Methyltransferase in Magnaporthe oryzae) Regulates Global Gene Expression during Infection-Related Morphogenesis
Source: PLOS journal article supplement (doi:10.1371/journal.pgen.1005385), 2015-07-31

Figure S9 Pham et al. PLoS Genet.

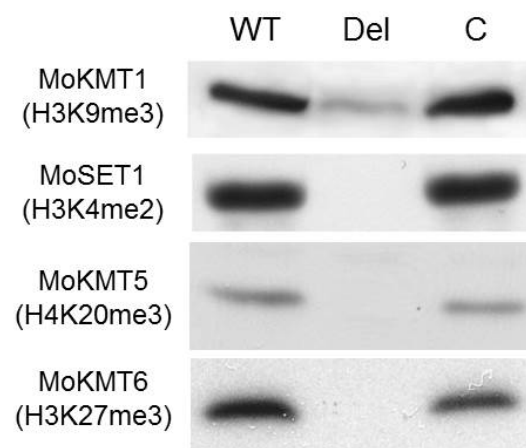

Supplement: S9 (10.1371/journal.pgen.1005385.s009) [file journal.pgen.1005385.s009]
