# Supplementary material for: MoSET1 (Histone H3K4 Methyltransferase in Magnaporthe oryzae) Regulates Global Gene Expression during Infection-Related Morphogenesis
Source: PLOS journal article supplement (doi:10.1371/journal.pgen.1005385), 2015-07-31
Supplement: S14 (10.1371/journal.pgen.1005385.s014) [file journal.pgen.1005385.s014]

**Table S1. *Magnaporthe oryzae* strains used in this study**

| Strain                | Genotype                                                  | Reference                     |
|-----------------------|-----------------------------------------------------------|-------------------------------|
| Br48                  | Wild type (wheat infecting isolate)                       | Urashima <i>et al.</i> , 1999 |
| $\Delta mokmt1.9$     | <i>Mokmt1</i> deletion mutant of Br48                     | This study                    |
| $\Delta mokmt1.13^*$  | <i>Mokmt1</i> deletion mutant of Br48                     | This study                    |
| MoKMT1E               | Ectopic transformant for $\Delta mokmt1$ deletion mutant  | This study                    |
| MoKMT1C               | Complementation strain of $\Delta mokmt1.9$ mutant        | This study                    |
| $\Delta moset1.35$    | <i>Moset1</i> deletion mutant of Br48                     | Vu <i>et al.</i> 2013         |
| $\Delta moset1.36^*$  | <i>Moset1</i> deletion mutant of Br48                     | Vu <i>et al.</i> 2013         |
| MoSET1.19E            | Ectopic transformant for $\Delta moset1$ deletion mutant  | Vu <i>et al.</i> 2013         |
| MoSET1C               | Complementation strain of $\Delta moset1.36$ mutant       | Vu <i>et al.</i> 2013         |
| $\Delta mokmt3.22^*$  | <i>Mokmt3</i> deletion mutant of Br48                     | This study                    |
| $\Delta mokmt3.26$    | <i>Mokmt3</i> deletion mutant of Br48                     | This study                    |
| MoKMT3E               | Ectopic transformant for $\Delta mokmt3$ deletion mutant  | This study                    |
| MoKMT3C               | Complementation strain of $\Delta mokmt3.26$ mutant       | This study                    |
| $\Delta mokmt4.17^*$  | <i>Mokmt4</i> deletion mutant of Br48                     | This study                    |
| $\Delta mokmt4.19$    | <i>Mokmt4</i> deletion mutant of Br48                     | This study                    |
| MoKMT4E               | Ectopic transformant for $\Delta mokmt4$ deletion mutant  | This study                    |
| $\Delta mokmt5.2^*$   | <i>Mokmt5</i> deletion mutant of Br48                     | This study                    |
| $\Delta mokmt5.4$     | <i>Mokmt5</i> deletion mutant of Br48                     | This study                    |
| MoKMT5E               | Ectopic transformant for $\Delta mokmt5$ deletion mutant  | This study                    |
| MoKMT5C               | Complementation strain of $\Delta mokmt5.2$ mutant        | This study                    |
| $\Delta mokmt6.5^*$   | <i>Mokmt6</i> deletion mutant of Br48                     | This study                    |
| $\Delta mokmt6.10$    | <i>Mokmt6</i> deletion mutant of Br48                     | This study                    |
| MoKMT6E               | Ectopic transformant for $\Delta mokmt6$ deletion mutant  | This study                    |
| MoKMT6C               | Complementation strain of $\Delta mokmt6.5$ mutant        | This study                    |
| $\Delta mokmt2h.8$    | <i>Mokmt2h</i> deletion mutant of Br48                    | This study                    |
| $\Delta mokmt2h.13^*$ | <i>Mokmt2h</i> deletion mutant of Br48                    | This study                    |
| MoKMT2hE              | Ectopic transformant for $\Delta mokmt2h$ deletion mutant | This study                    |
| MoKMT2hC              | Complementation strain of $\Delta mokmt2h.13$ mutant      | This study                    |
| $\Delta moset6.14^*$  | <i>Moset6</i> deletion mutant of Br48                     | This study                    |
| $\Delta moset6.16$    | <i>Moset6</i> deletion mutant of Br48                     | This study                    |
| MoSET6E               | Ectopic transformant for $\Delta moset6$ deletion mutant  | This study                    |

\*representative strains were used throughout this study unless otherwise noted.
